# Supplementary material for: Prognostic Analysis of Invasive Ductal Carcinoma of the Breast in Ethnic Minorities in Northeast China
Source: Research Square preprint supplement (doi:10.21203/rs.3.rs-8297694/v1), 2025-12-15
Supplement: Supplementary file 1 [file 36f1c74a4794798052446484.docx]

Appendix Table 1. EFS and OS of Breast Cancer Subtypes in Ethnic Minorities.

| Variables | N | Events | Median (95%CI) | Rate/1000 (person-years) | Logrank P value |
| --- | --- | --- | --- | --- | --- |
| Subtype(**EFS**) |  |  |  |  | **<.001** |
| HR-HER2- | 126 | 75 | 63.57 (48.53 - 88.53) | 353.83 |  |
| HR-HER2+ | 83 | 52 | 66.63 (54.30 - 84.80) | 1380.53 |  |
| HR+HER2- | 512 | 208 | 104.17 (97.53 - 117.73) | 6034.82 |  |
| HR+HER2+ | 126 | 60 | 85.57 (64.80 - 106.37) | 2295.92 |  |
| Subtype(**OS**) |  |  |  |  | **<.001** |
| HR-HER2- | 126 | 72 | 75.17 (62.23 - 94.80) | 319.53 |  |
| HR-HER2+ | 83 | 48 | 85.90 (75.70 - 99.23) | 795.14 |  |
| HR+HER2- | 512 | 188 | 121.83 (113.90 - 137.00) | 3175.68 |  |
| HR+HER2+ | 126 | 57 | 92.20 (83.97 - 135.57) | 1225.81 |  |

Appendix Table 2. EFS and OS of Breast Cancer Subtypes in Manchu Ethnic Minorities.

| Variables | N | Events | Median (95%CI) | Rate/1000 (person-years) | Logrank P value |
| --- | --- | --- | --- | --- | --- |
| Subtype(**EFS**) |  |  |  |  | 0.122 |
| HR-HER2- | 66 | 35 | 85.60 (48.53 - 116.13) | 133.59 |  |
| HR-HER2+ | 43 | 28 | 66.63 (54.30 - 97.27) | 217.90 |  |
| HR+HER2- | 235 | 104 | 103.10 (90.63 - 119.50) | 736.72 |  |
| HR+HER2+ | 67 | 32 | 88.10 (64.40 - NA) | 662.07 |  |
| Subtype(**OS**) |  |  |  |  | 0.089 |
| HR-HER2- | 66 | 32 | 88.90 (62.73 - NA) | 122.14 |  |
| HR-HER2+ | 43 | 27 | 87.70 (72.77 - 129.60) | 127.78 |  |
| HR+HER2- | 235 | 93 | 118.37 (109.30 - 138.67) | 557.33 |  |
| HR+HER2+ | 67 | 29 | 104.27 (86.87 - NA) | 214.87 |  |

Appendix Table 3. EFS of Breast Cancer Subtypes in the Korean, Mongolian, and Hui Ethnic Groups.

| Variables | N | Events | Median (95%CI) | Rate/1000 (person-years) | Logrank P value |
| --- | --- | --- | --- | --- | --- |
| Subtype **(Korean)** |  |  |  |  | **<.001** |
| HR-HER2- | 22 | 19 | 36.83 (18.20 - 63.57) | 166.08 |  |
| HR-HER2+ | 10 | 4 | 100.10 (46.60 - NA) | 39.96 |  |
| HR+HER2- | 80 | 33 | 77.53 (71.37 - NA) | 462.40 |  |
| HR+HER2+ | 16 | 11 | 45.23 (23.97 - NA) | 235.04 |  |
| Subtype**(Mongolian)** |  |  |  |  | **<.001** |
| HR-HER2- | 16 | 9 | 91.80 (34.77 - NA) | 271.36 |  |
| HR-HER2+ | 13 | 11 | 65.60 (28.23 - NA) | 389.61 |  |
| HR+HER2- | 79 | 26 | 149.30 (109.70 - NA) | 282.81 |  |
| HR+HER2+ | 18 | 6 | 97.07 (91.57 - NA) | 61.81 |  |
| Subtype**(Hui**) |  |  |  |  | **0.011** |
| HR-HER2- | 15 | 8 | 66.53 (39.13 - NA) | 120.24 |  |
| HR-HER2+ | 15 | 7 | 76.07 (50.17 - NA) | 83.40 |  |
| HR+HER2- | 90 | 35 | 106.33 (94.23 - 122.87) | 289.58 |  |
| HR+HER2+ | 18 | 9 | 85.57 (41.40 - NA) | 203.62 |  |

Appendix Table 4. OS of Breast Cancer Subtypes in the Korean, Mongolian, and Hui Ethnic Groups.

| Variables | N | Events | Median (95%CI) | Rate/1000 (person-years) | Logrank P value |
| --- | --- | --- | --- | --- | --- |
| Subtype **(Korean)** |  |  |  |  | **0.001** |
| HR-HER2- | 22 | 19 | 65.53 (29.93 - 94.63) | 120.23 |  |
| HR-HER2+ | 10 | 3 | 121.60 (90.07 - NA) | 24.67 |  |
| HR+HER2- | 80 | 32 | 101.37 (86.20 - 141.47) | 262.58 |  |
| HR+HER2+ | 16 | 11 | 64.43 (46.90 - NA) | 81.14 |  |
| Subtype**(Mongolian)** |  |  |  |  | **0.003** |
| HR-HER2- | 16 | 9 | 75.17 (61.83 - NA) | 145.55 |  |
| HR-HER2+ | 13 | 10 | 75.70 (62.35 - NA) | 205.62 |  |
| HR+HER2- | 79 | 23 | 197.63 (120.30 - NA) | 94.35 |  |
| HR+HER2+ | 18 | 6 | 99.03 (84.63 - NA) | 27.18 |  |
| Subtype**(Hui**) |  |  |  |  | **<.001** |
| HR-HER2- | 15 | 8 | 67.10 (38.73 - NA) | 111.78 |  |
| HR-HER2+ | 15 | 6 | 76.07 (67.93 - NA) | 66.64 |  |
| HR+HER2- | 90 | 33 | 137.00 (113.70 - 160.77) | 154.01 |  |
| HR+HER2+ | 18 | 9 | 72.70 (47.73 - NA) | 129.25 |  |

Appendix Table 5. EFS and OS of Breast Cancer Subtypes in Daur Ethnic Minorities.

| Variables | N | Events | Median (95%CI) | Rate/1000 (person-years) | Logrank P value |
| --- | --- | --- | --- | --- | --- |
| Subtype(**EFS**) |  |  |  |  | 0.304 |
| HR-HER2- | 7 | 4 | 211.97 (24.70 - NA) | 18.87 |  |
| HR-HER2+ | 2 | 2 | 41.05 (37.67 - NA) | 53.10 |  |
| HR+HER2- | 28 | 10 | 98.20 (74.60 - NA) | 290.14 |  |
| HR+HER2+ | 7 | 2 | NA (26.13 - NA) | 76.53 |  |
| Subtype(**OS**) |  |  |  |  | 0.400 |
| HR-HER2- | 7 | 4 | 225.33 (29.80 - NA) | 17.75 |  |
| HR-HER2+ | 2 | 2 | 63.62 (60.37 - NA) | 33.13 |  |
| HR+HER2- | 28 | 7 | 153.13 (121.70 - NA) | 118.24 |  |
| HR+HER2+ | 7 | 2 | NA (46.50 - NA) | 43.01 |  |

Appendix fig. 1

**
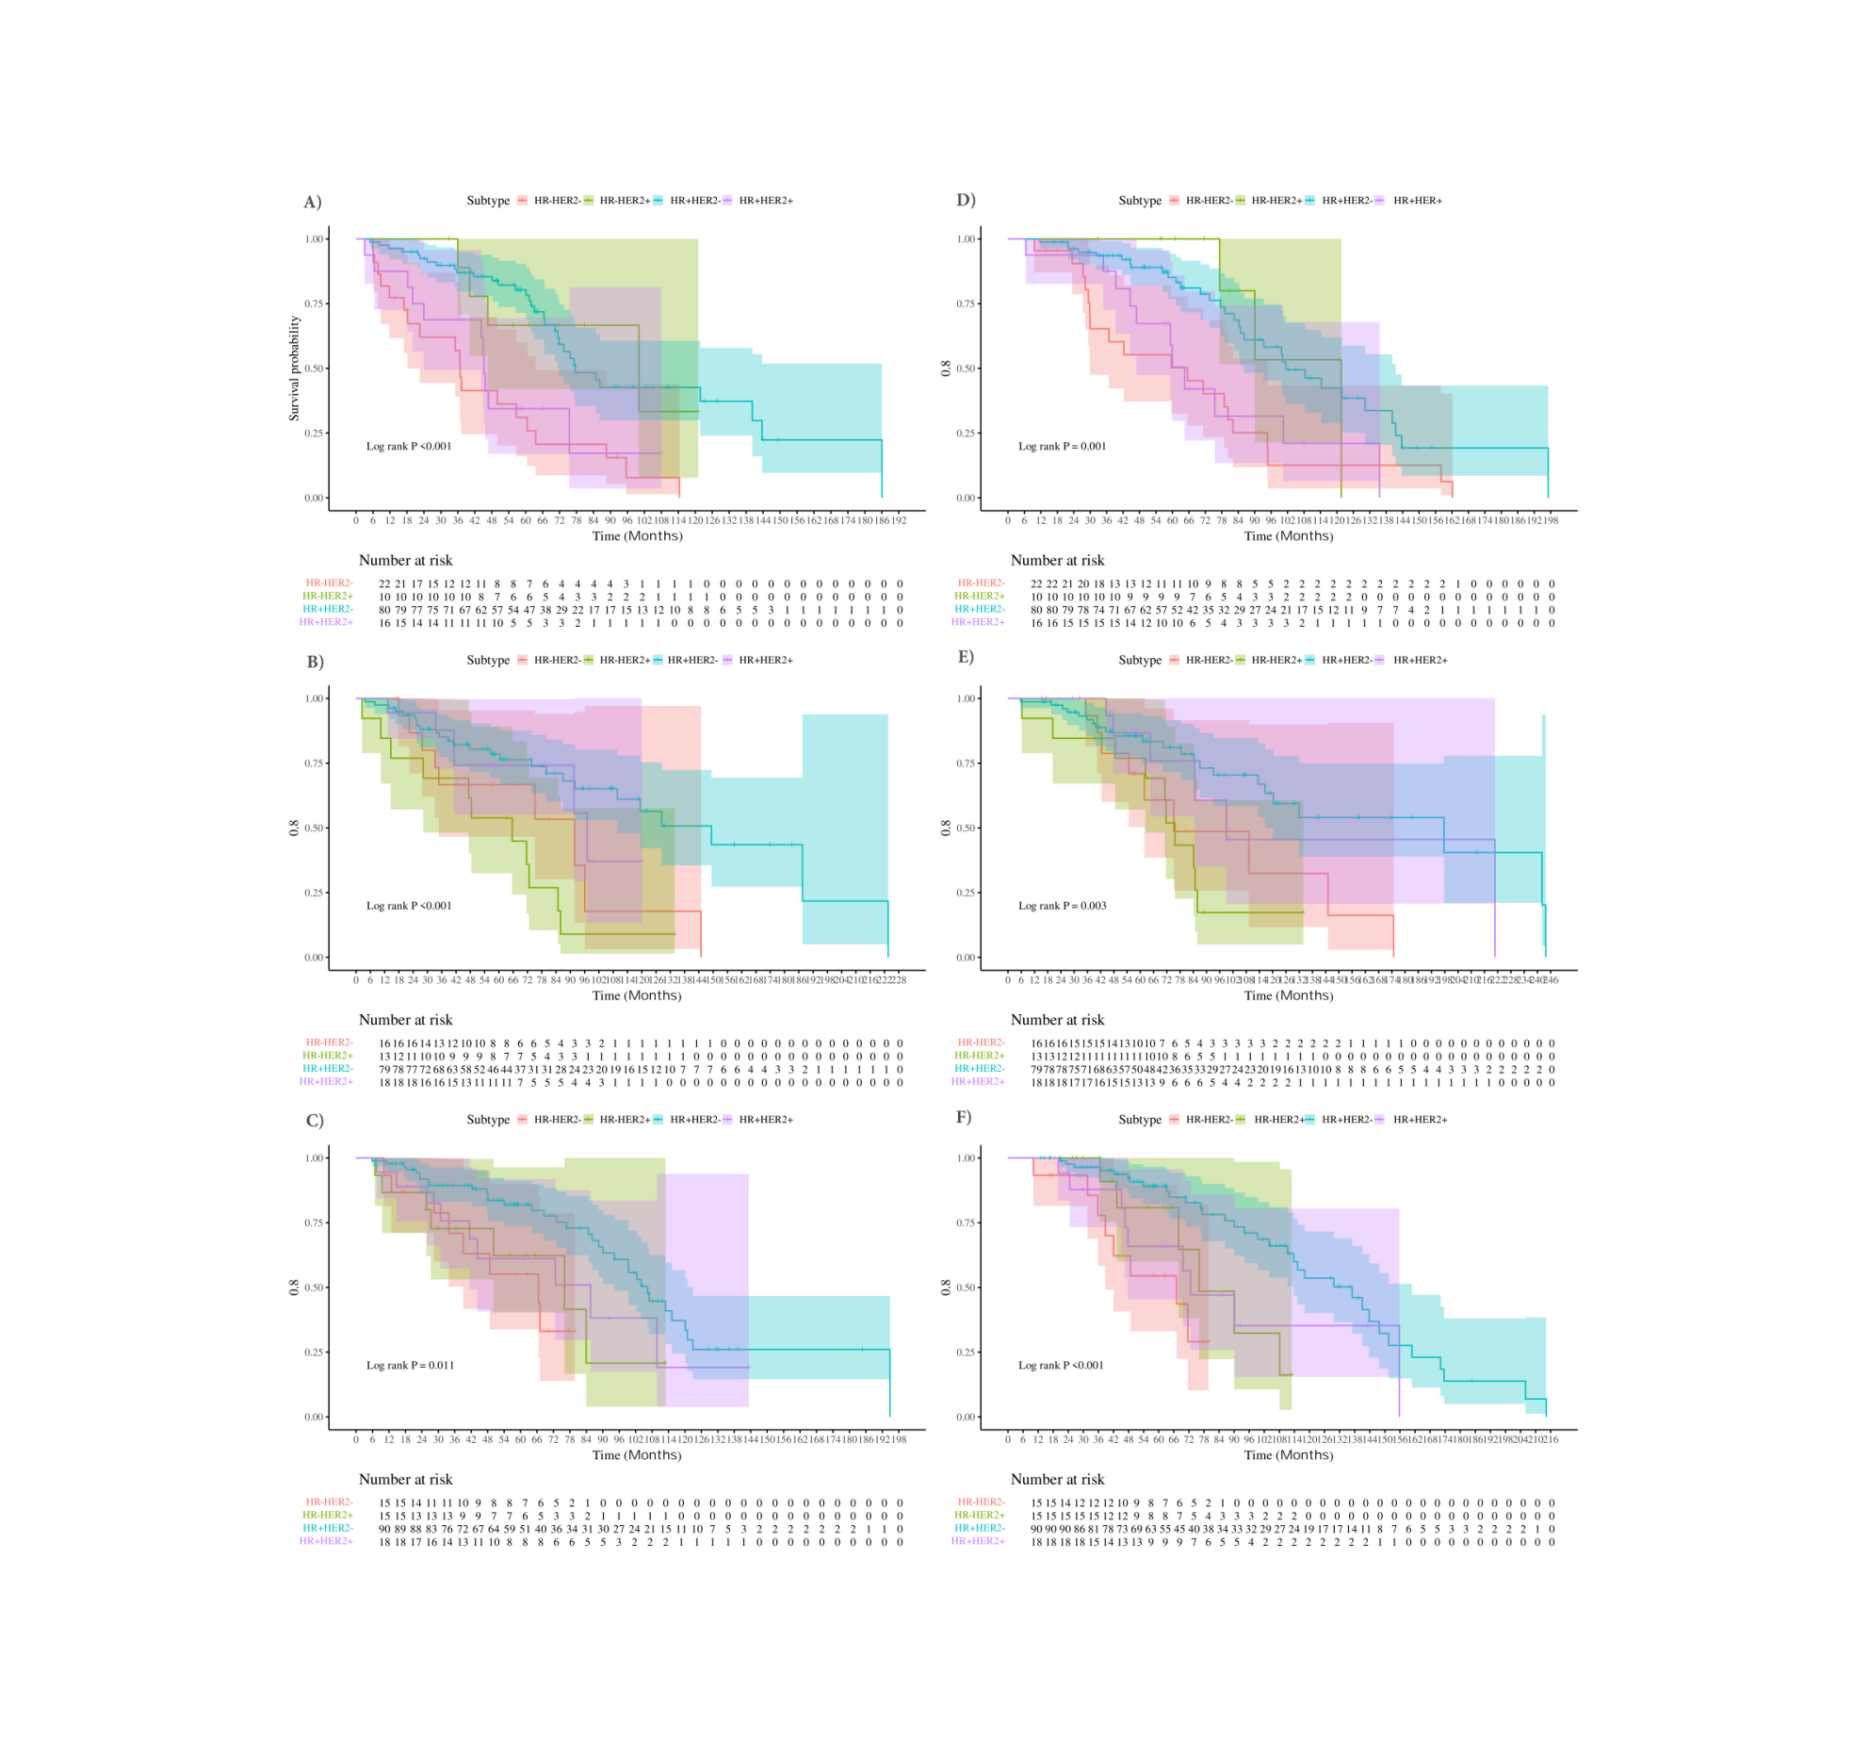
**Appendix fig. 1 Kaplan-Meier Curves for EFS of Breast Cancer Subtypes in Korean(A), Mongolian(B), and Hui(C) Ethnic Minorities; Kaplan-Meier Curves for OS of Breast Cancer Subtypes in Korean(D), Mongolian(E), and Hui(F) Ethnic Minorities.

Appendix fig. 2


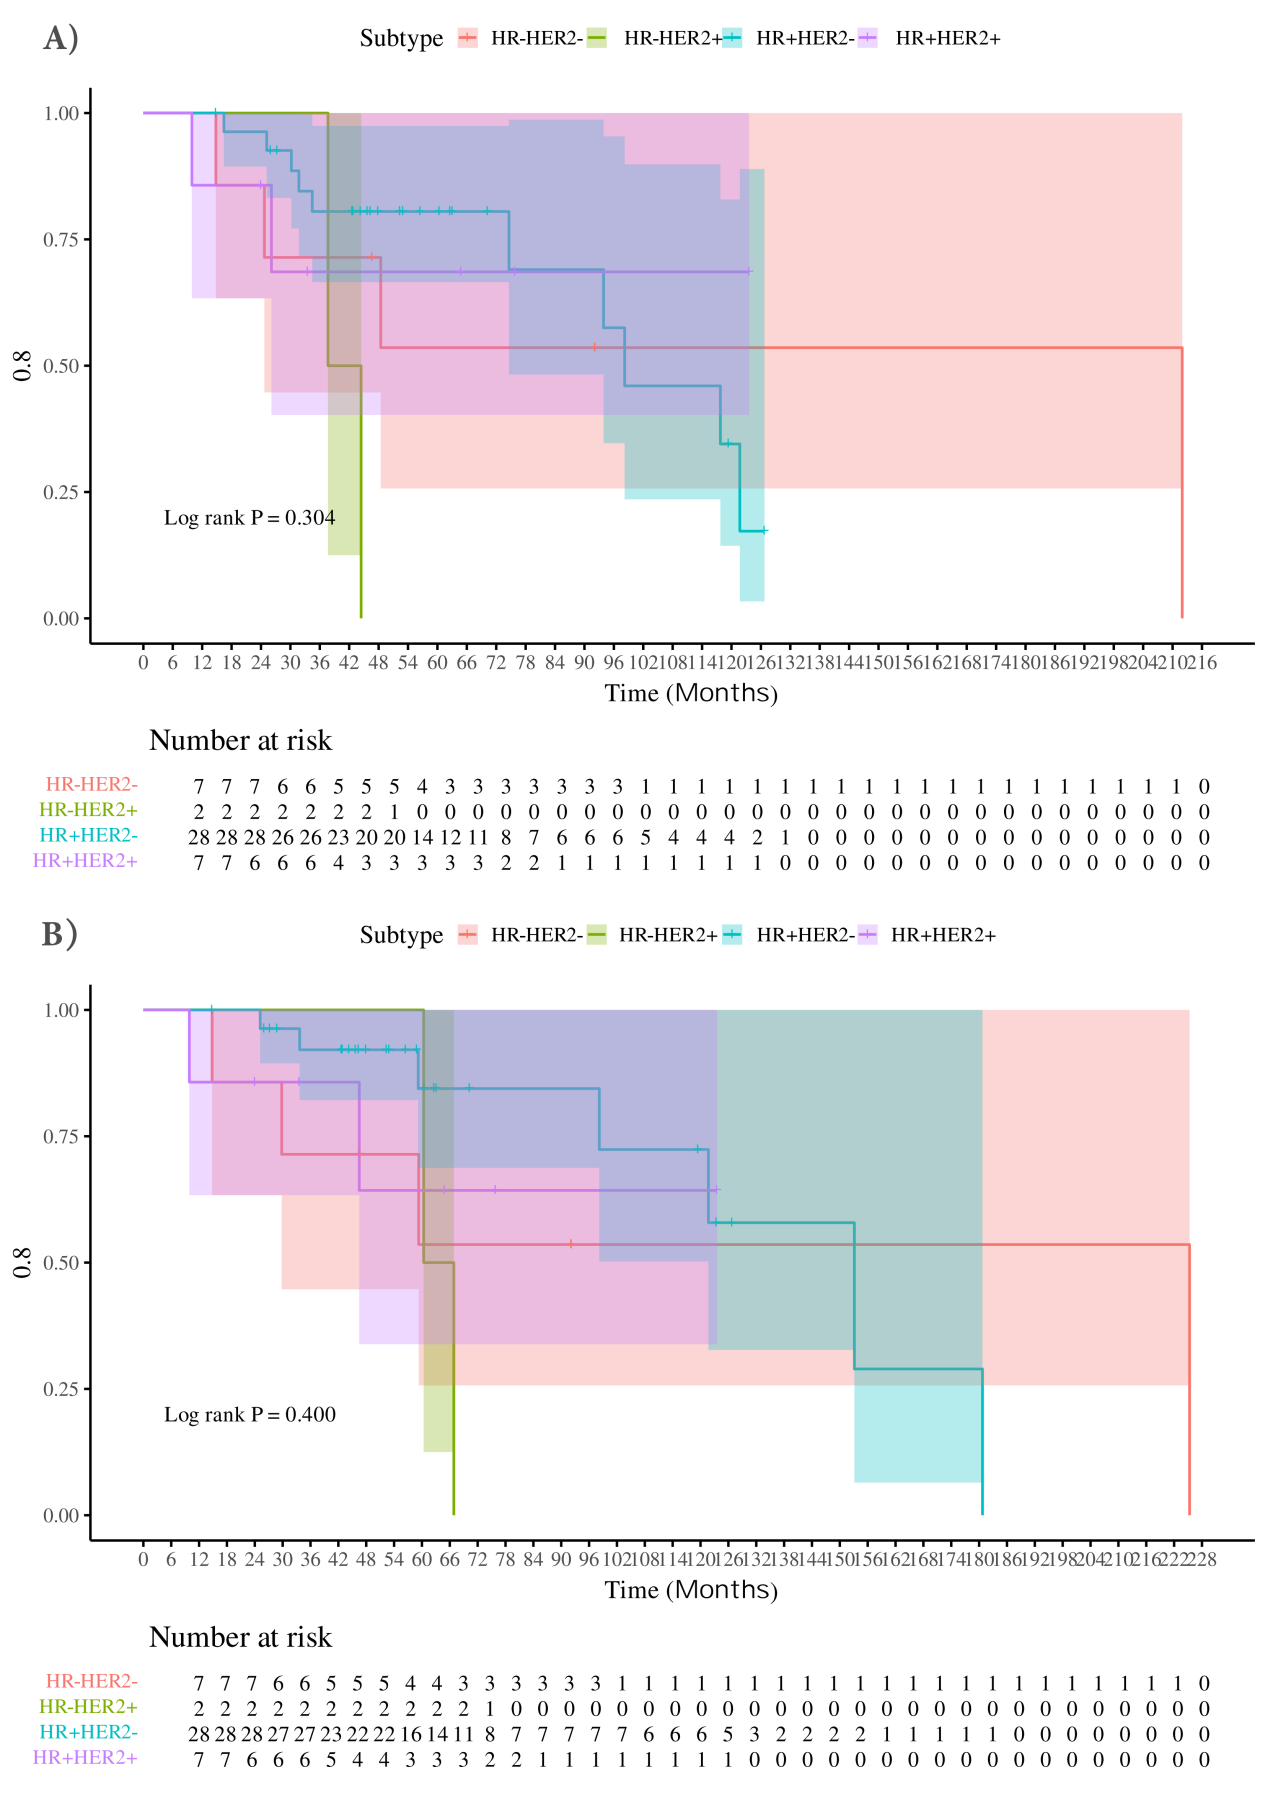
Appendix fig. 2 Kaplan-Meier Curves for EFS(A) and OS(B) of Breast Cancer Subtypes in Daur Ethnic Minorities.
